# Supplementary material for: Characterization and dynamics of pericentromere-associated domains in mice
Source: HighWire-hosted journal article supplement (doi:10.1101/gr.186643.114), 2015-04-16
Supplement: Supplemental_Figure_Legend.docx [file Supplemental_Figure_Legend.docx]

**Supplemental Figure S1**

1. Schematic overview of Sat4C strategy. In contrast to regular 4C, fragmentation was done with a combination of ApoI (A, cuts in most major satellite repeats and throughout the genome) and MfeI (M, cuts throughout the genome but not in major satellites). The 4C procedure for ligation events between 5' AATT overhangs of ApoI-digested major satellite repeats and MfeI-digested genomic fragments (left box) will enrich for MfeI fragments that are interacting with satellite repeats. In case of self-ligations between ApoI-digested satellite fragments or with ApoI-digested genomic fragments (right box), re-digesting with ApoI before inverse PCR enrichment impairs amplification. As a result, sequencing material is enriched for ligation events between satellite repeats and genomic MfeI fragments. Brown boxes indicate formaldehyde crosslinks.
2. Sat4C maps for Chromosome 17 from three biological replicate mouse thymus samples. Blocks below sat4C map indicate gene positions on each strand. Note the high reproducibility between the replicates.
