# Supplementary material for: Characterization and dynamics of pericentromere-associated domains in mice
Source: HighWire-hosted journal article supplement (doi:10.1101/gr.186643.114), 2015-04-16
Supplement: Supplemental_Information.docx [file Supplemental_Information.docx]

**SUPPLEMENTAL INFORMATION**

**Primers used in sat4C**

Sat4C forward *AATGATACGGCGACCACCGAACACTCTTTCCCTACACGACGCTCTTCCGATCTAACTGAAAAAGGTGGAAAATTG*

Sat4C reverse

*CAAGCAGAAGACGGCATACGATTTAGTGATTTCGTCATT*

**Primers used for chromatin immunoprecipitation:**

actB promoter for

*GCAGGCCTAGTAACCGAGACA*

actB promoter rev

*AGTTTTGGCGATGGGTGCT*

Myf5 promoter for

*GGAGATCCGTGCGTTAAGAATCC*

Myf5 promoter rev

*CGGTAGCAAGACATTAAAGTTCCGTA*

mCherry promoter for

*AGCTACTTGTTCTTTTTGCAGGA*

mCherry promoter rev

*GAAGCGCATGAACTCCTTGA*

Olfr932_gene_for

*TTACTCCAAACATCTAATGGCTTCT*

Olfr932_gene_rev

*ATGTCTCAGGCAGAAATGTAGGG*

**Primers used for identification of integration sites**

KmonP-N7-CCTAG

*GTACGAGAATCGCTGTCCTNNNNNNNCCTAG*

*KmonP*

*GTACGAGAATCGCTGTCCT*

MIS-NeoR-L1-for (looking from Neo end of transgene)

*GTGGAGAGGCTATTCGGCTATGACT*

MIS-NeoR-L2-for

*CTCCTGCCGAGAAAGTATCCATCAT*

MIS-AmpR-L1-for (looking from Amp end of transgene)

*TAACTATGCGGCATCAGAGCAGATT*

MIS-AmpR-L2-for

*ATGCGTAAGGAGAAAATACCGCATC*
